# Supplementary material for: Early nasal microbiota and subsequent respiratory tract infections in infants with cystic fibrosis
Source: PubMed Central journal article supplement — Commun Med (Lond). 2024 Nov 23;4:246. doi: 10.1038/s43856-024-00616-6 (PMC11585651; doi:10.1038/s43856-024-00616-6), 2024-11-23
Supplement: 43856_2024_616_MOESM3_ESM.pdf [file 43856_2024_616_MOESM3_ESM.pdf]

## Description of Additional Supplementary Files

**File name:** Supplementary Data 1

**File description:** This dataset includes relative abundances of bacterial families, Shannon-diversity index values, and basic participant information.

**File name:** Supplementary Data 2

**File description:** Bray-curtis dissimilarity matrix.
